# Supplementary material for: Loss of expression of the double strand break repair protein ATM is associated with worse prognosis in colorectal cancer and loss of Ku70 expression is associated with CIN
Source: PubMed Central journal article supplement (PMC3717797; doi:10.18632/oncotarget.694), 2012-10-28

**Loss of expression of ATM is associated with worse prognosis in colorectal cancer and loss of Ku70 expression is associated with CIN – Beggs et al**

**Figure S1: H2AX representative sections for IHC scoring**

Positive:

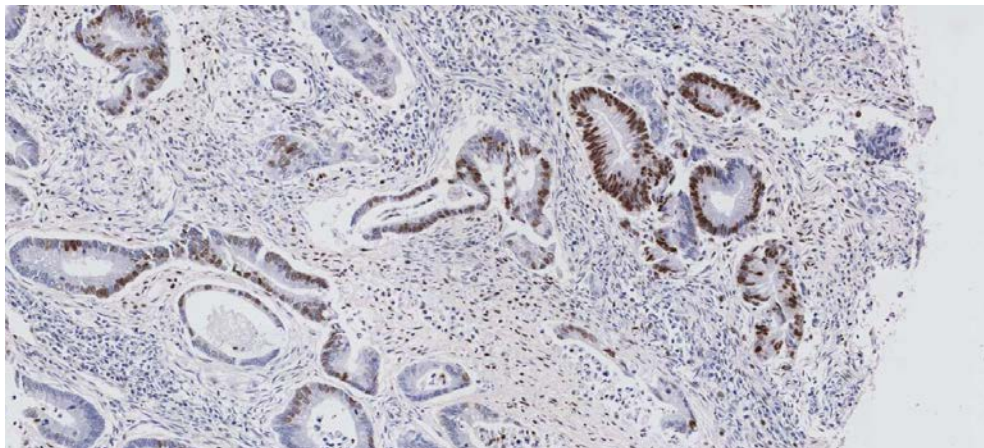

Negative:

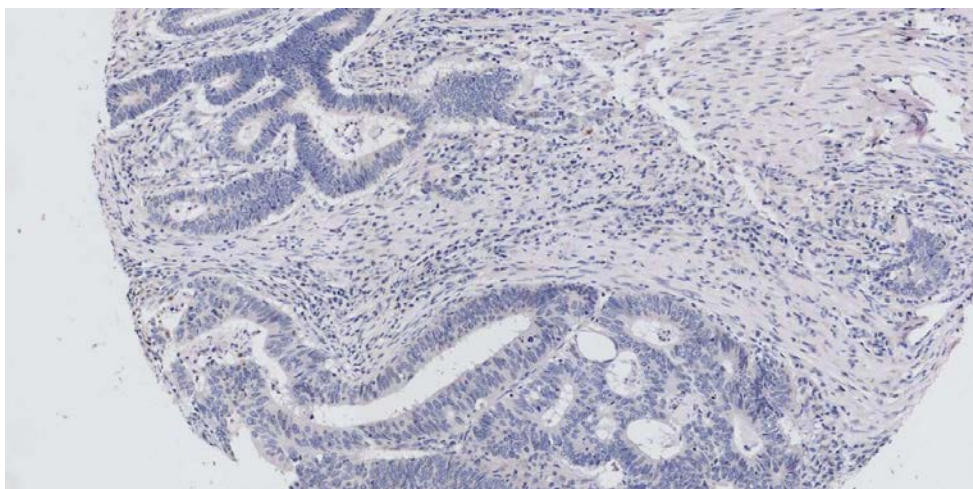

**Figure S2: ATM representative sections for IHC scoring**

Positive (left image = low power, right image = high power):

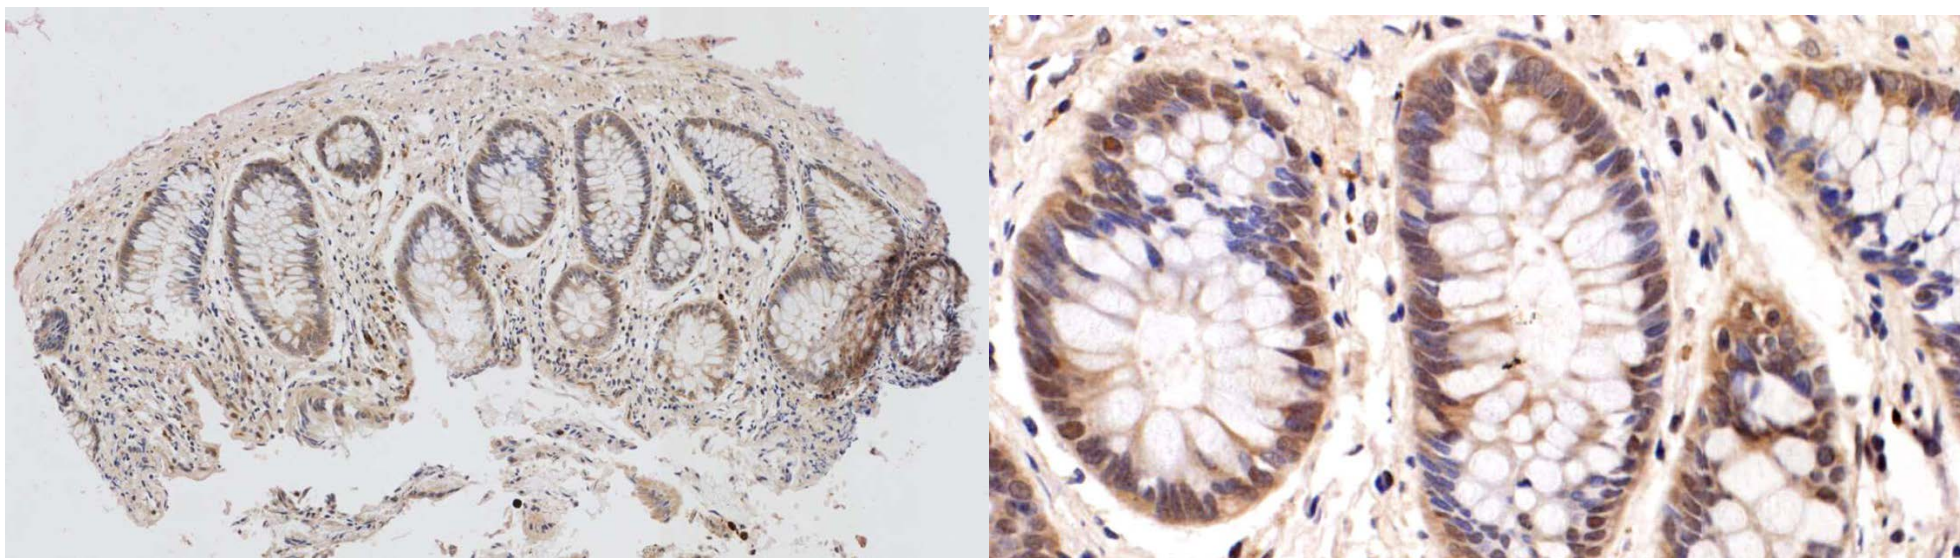

Negative (left image = low power, right image = high power)

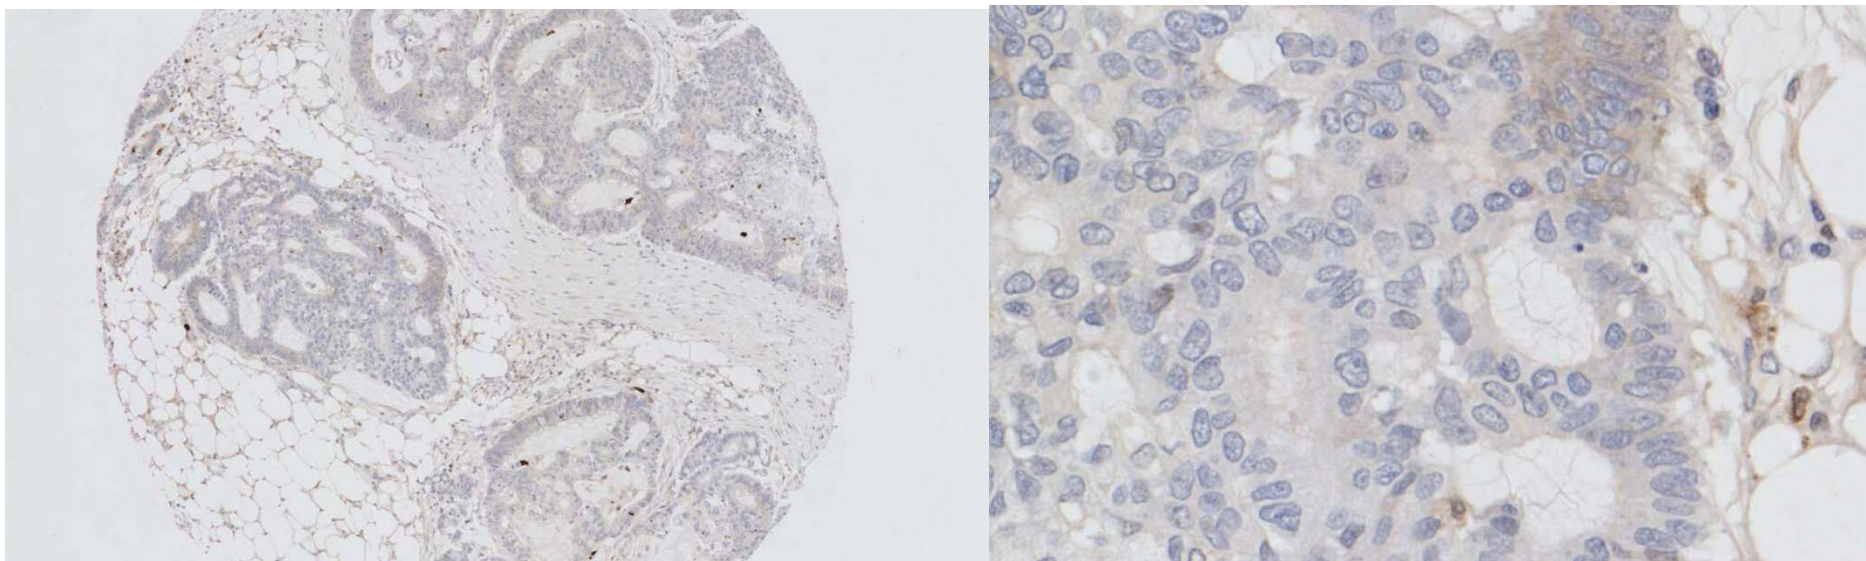

**Figure 3: Ku70 representation sections for IHC scoring**

Positive:

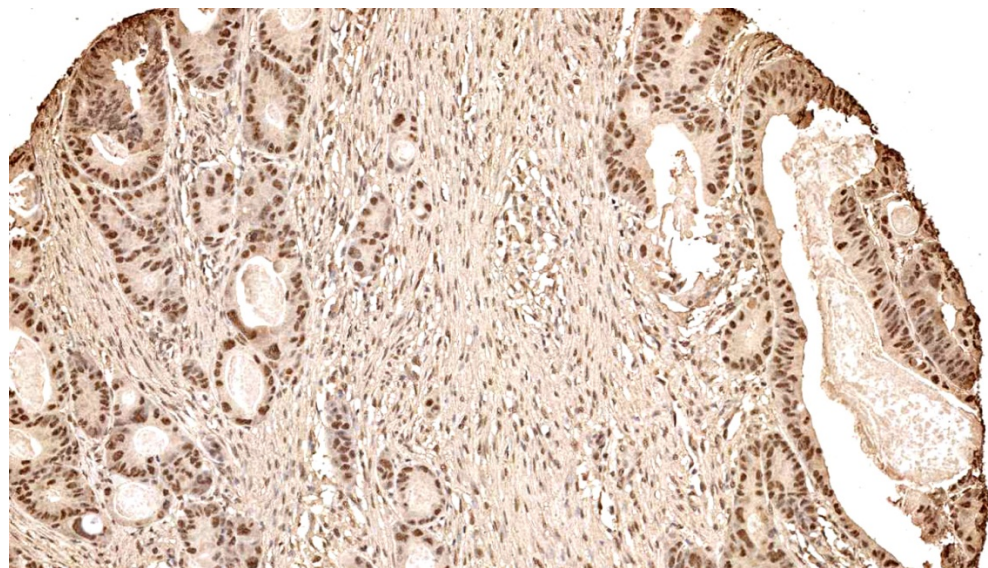

Negative:

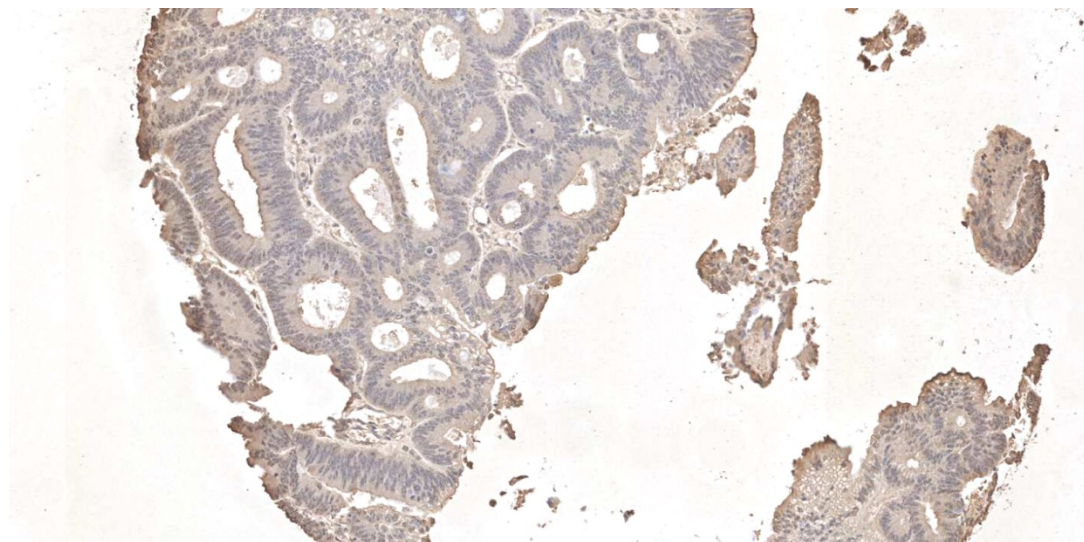

Supplement: oncotarget-03-1348-s001.pdf [file oncotarget-03-1348-s001.pdf]
